# Supplementary material
Source: PubMed Central journal article supplement (PMC5698177)
Supplement: NIHMS906207-supplement-1.pdf [file NIHMS906207-supplement-1.pdf]

## SUPPLEMENTARY INFORMATION

### Crystal structures reveal an elusive functional domain of pyrrolysyl-tRNA synthetase

Tateki Suzuki<sup>a</sup>, Corwin Miller<sup>a,f</sup>, Li-Tao Guo<sup>a</sup>, Joanne M. L. Ho<sup>a</sup>, David I. Bryson<sup>c</sup>,  
Yane-Shih Wang<sup>a,g</sup>, David R. Liu<sup>c,d,e</sup>, and Dieter Söll<sup>a,b,\*</sup>

*Departments of <sup>a</sup>Molecular Biophysics & Biochemistry, and <sup>b</sup>Chemistry,  
Yale University, New Haven, CT, USA*

*<sup>c</sup>Department of Chemistry and Chemical Biology, Harvard University*

*<sup>d</sup>Howard Hughes Medical Institute, Cambridge, MA, USA*

*<sup>e</sup>Broad Institute of Harvard and MIT, Cambridge, MA, 02142, USA*

*<sup>f</sup>Current address: DS Therapeutics, Houston, TX, 77056, USA*

*<sup>g</sup>Current address: Institute of Biological Chemistry, Academia Sinica, Taipei, Taiwan*

- Supplementary Figure 1. Non-canonical amino acid chemical structures
- Supplementary Figure 2. Alignment of eight archaeal *Methanosarcina* PylRS sequences
- Supplementary Figure 3. The structures of PylRS and a PANCE-evolved variant in complex with tRNA<sup>Pyl</sup> with the electron density map
- Supplementary Figure 4. PylRS facilitates read-through of M13 *gIII*
- Supplementary Figure 5. Range of substrate specificity of two MmPylRS enzymes
- Supplementary Figure 6. sfGFP expression facilitated by PANCE-evolved chPylRS variants
- Supplementary Figure 7. Western blot analysis of full-length and split PANCE-evolved chPylRS variants
- Supplementary Figure 8. ESI-MS analysis of Ni-NTA-purified affinity-tagged PANCE-evolved chPylRS variants
- Supplementary Figure 9. Structural insight into PANCE mutations in the chPylRS CTD
- Supplementary Table 1. Apparent kinetic parameters of PylRSs and chPylRS for Pyl acylation
- Supplementary Table 2. Genotypes of mutant chPylRS variants resulting from this work.
- Supplementary Table 3. Crystallographic data collection and refinement statistics
- Supplementary Table 4. Plasmids used in this work

## SUPPLEMENTARY RESULTS

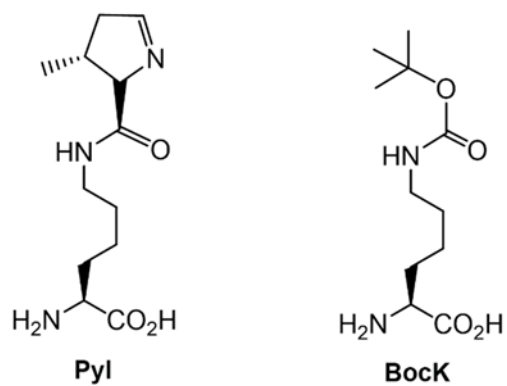

**Supplementary Figure 1** | Non-canonical amino acid chemical structures. L-pyrrolysine (**Pyl**) and *N* $\epsilon$ -(tert-butoxycarbonyl)-L-lysine (**Bock**).





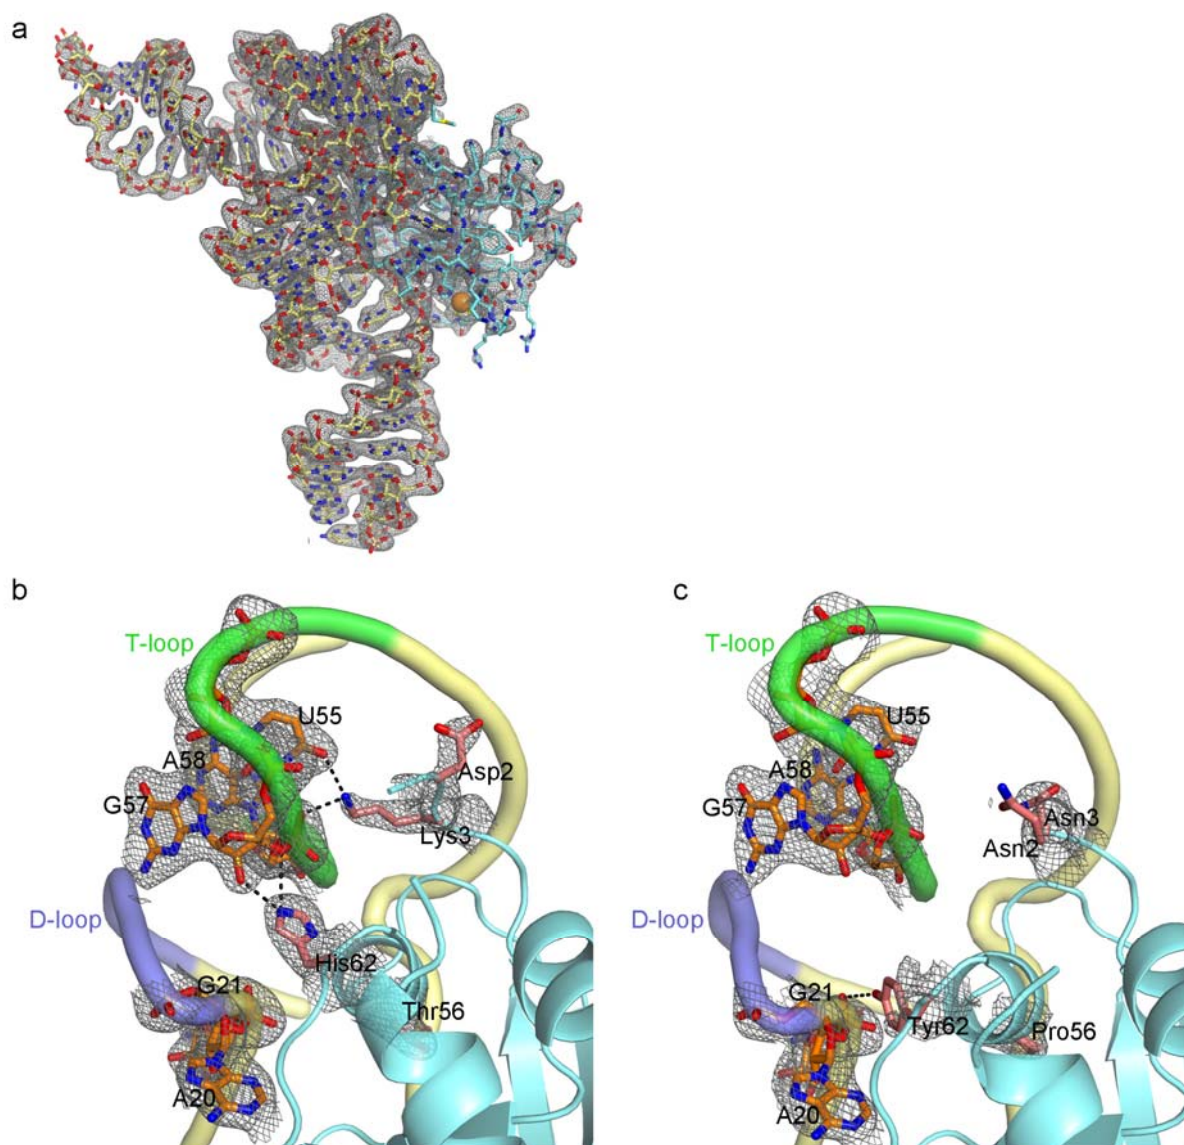

**Supplementary Figure 3** | The structures of PylRS and a PANCE-evolved variant in complex with tRNA<sup>Pyl</sup> with the electron density map. (a) Overview of the 2F<sub>o</sub>-F<sub>c</sub> map for MmPylRS NTD • tRNA<sup>Pyl</sup> complex contoured at 1σ. MmPylRS NTD (cyan) and tRNA<sup>Pyl</sup> (yellow) are shown in stick model. Zn<sup>2+</sup> is shown as an orange sphere. (b) The simulated annealing composite omit map of the interface between MmPylRS NTD and tRNA<sup>Pyl</sup> contoured at 1σ. (c) The simulated annealing composite omit map of the interface between PANCE-evolved variant 32A NTD and tRNA<sup>Pyl</sup> contoured at 1σ. Evolved residues in PANCE (pink) and nucleotides interacting with the NTD of each PylRS variant (orange) are shown in stick. Polar interactions between PylRS residues and tRNA nucleotides are shown by a black dashed line.

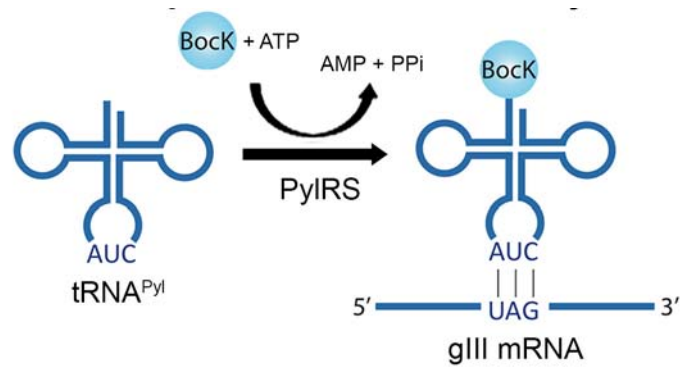

**Supplementary Figure 4** | PylRS facilitates read-through of M13 *gIII*. PylRS forms Bock-tRNA<sup>Pyl<sub>am</sub></sup>, which is then recruited to the ribosome by EF-Tu, enabling read-through of UAG codons by Bock.

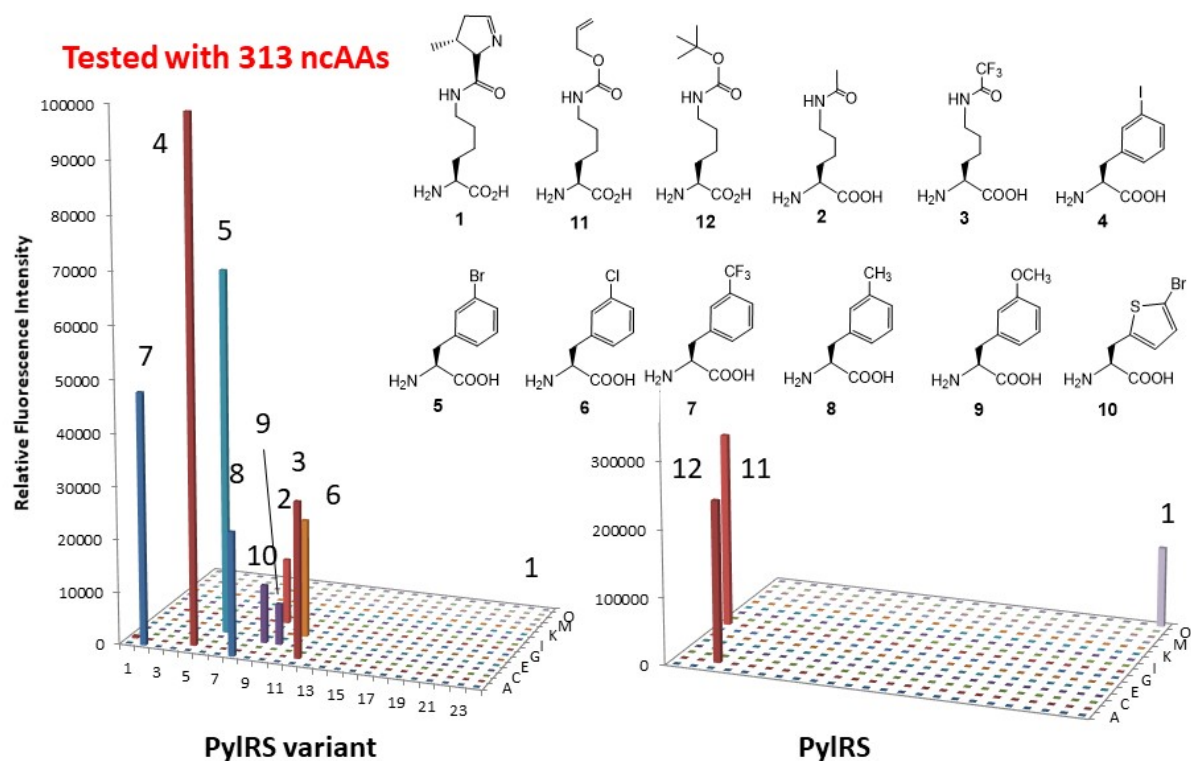

**Supplementary Figure 5** | Range of substrate specificity of two MmPyIRS enzymes. Wild-type MmPyIRS and MmPyIRS-L301M/Y306L/L309A/C348F<sup>2</sup>. Suppression of the sfGFP-UAG2 gene by the library of ncAA-tRNA<sup>Pyl</sup> was measured by fluorescence intensity. Note that the PyIRS variant is much less active than wild-type PyIRS. A library of 313 ncAAs (see Supplementary Table 2 in reference<sup>3</sup>) was tested. Fluorescence signals from the incorporation of ncAAs **1–12** are labeled. Well A1 is a control without added ncAA. Inserted chemical structures of ncAAs used in this figure: **1**, L-pyrrolysine (Pyl); **2**, N<sup>ε</sup>-acetyl-L-Lys (AcK); **3**, N<sup>ε</sup>-trifluoroacetyl-L-Lys (CF<sub>3</sub>-AcK); **4**, 3-iodo-L-Phe (3-I-Phe); **5**, 3-bromo-L-Phe (3-Br-Phe); **6**, 3-chloro-L-Phe (3-Cl-Phe); **7**, 3-trifluoromethyl-L-Phe (3-CF<sub>3</sub>-Phe); **8**, 3-methyl-L-Phe (3-Me-Phe); **9**, 3-methoxy-L-Phe (3-MeO-Phe); **10**, 3-bromo-L-ThA (3-Br-ThA); **11**, N<sup>ε</sup>-allyloxycarbonyl-L-Lys (AlocK); **12**, N<sup>ε</sup>-t-butyloxycarbonyl-L-Lys (BocK).

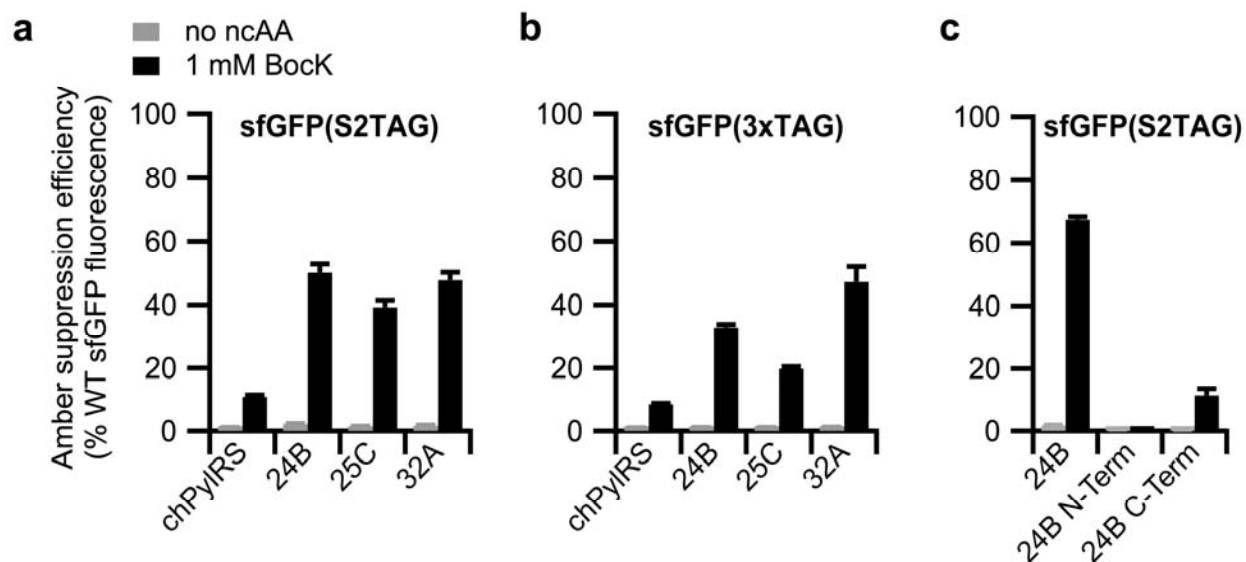

**Supplementary Figure 6** | sfGFP expression facilitated by PANCE-evolved chPyIRS variants. The relative expression of **(a)** sfGFP containing a single UAG codon at position 2 (Ser) **(b)** sfGFP(3xTAG) containing three UAG codons at positions 39 (Asn), 135 (Asn), and 151 (Tyr) was compared in the presence or absence of 1 mM Bock. **(c)** The relative expression of sfGFP containing a single UAG codon at position 2 (Ser) mediated by either the split enzyme, 24B or the individual N- or C-terminal fragment of 24B in the presence or absence of 1 mM Bock. Each value and error bar reflects the mean and s.d. of four independent replicates.

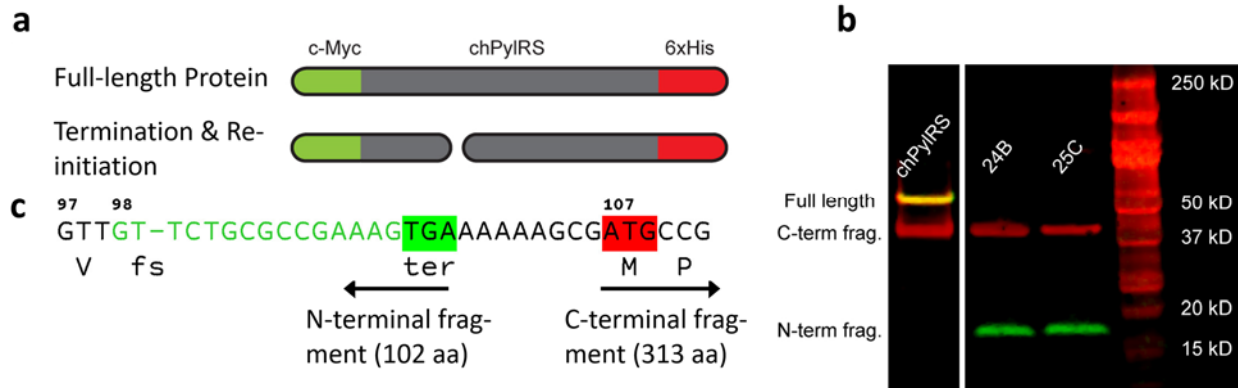

**Supplementary Figure 7** | Western blot analysis of full-length and split PANCE-evolved chPyIRS variants. (a) The chPyIRS variants were N-terminally tagged with c-Myc and C-terminally tagged with 6xHis to enable two-color detection of the expressed proteins to characterize translation of stop codon-containing mutants that arose during PANCE. (b) Western blot analysis of the protein lysates expressed in BL21 star (DE3) cells. Wild-type chPyIRS is expressed as a full-length protein, but the presence of this internal start site also generates the 313 aa C-terminal fragment. The split variants (24B and 25C) are expressed as distinct N- and C-terminal fragments. (c) Nucleotide sequence of genes encoding 25C from codon 97 (V) to codon 108 (P). fs, denotes the position of the -1 frameshift (deletion of T); ter, indicates the UGA stop codon releasing the N-terminal fragment. Initiation of the C-terminal fragment occurs at codon 107 (M).



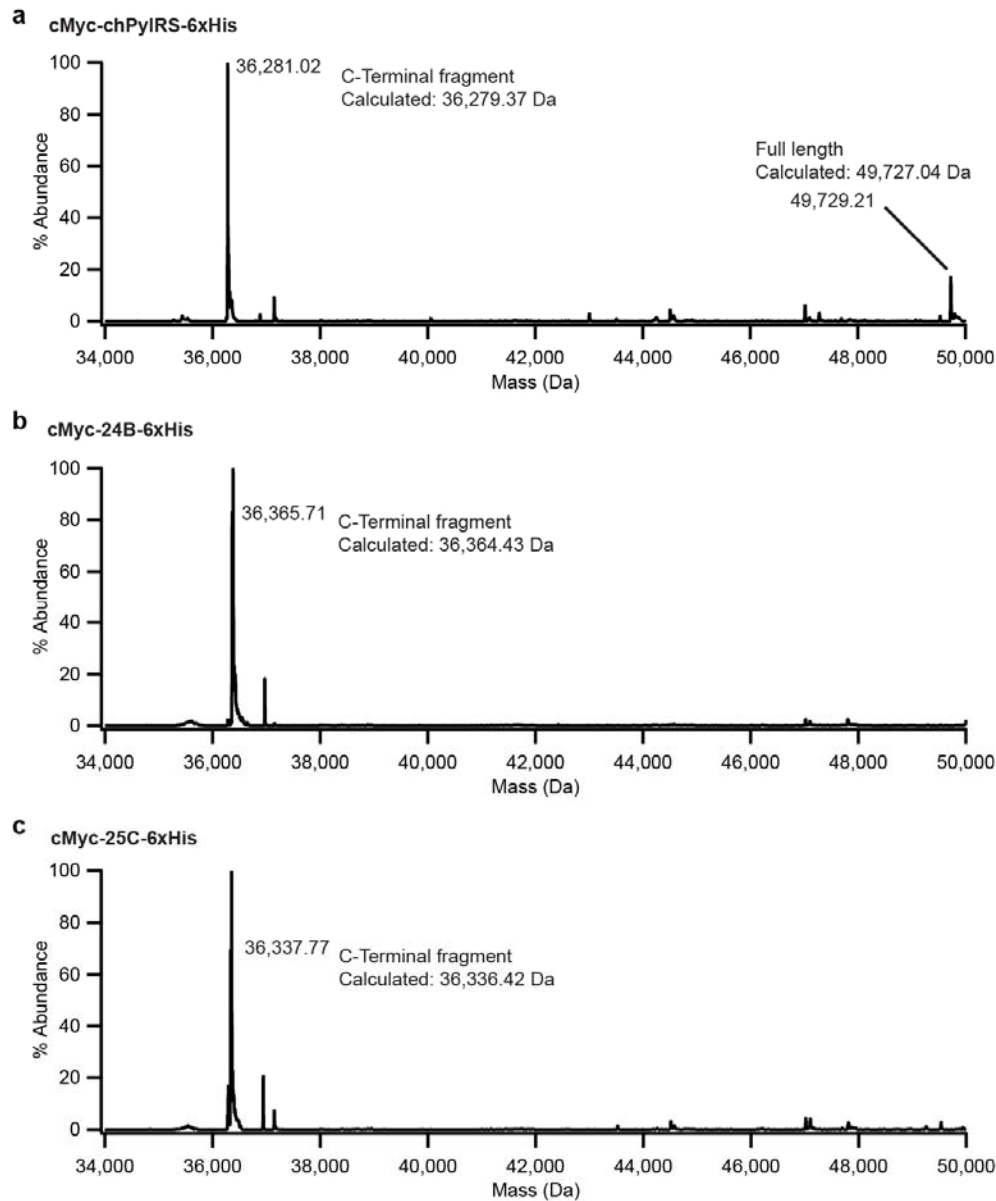

**Supplementary Figure 8 | ESI-MS analysis of Ni-NTA-purified affinity-tagged PANCE-evolved chPylRS variants. (a-c)** The PylRS variants, chPylRS (a), 24B (b), and 25C (c) containing an N-terminal c-Myc-tag and a C-terminal 6xHis-tag analyzed by ESI-MS analysis. In the split variants of chPylRS, the N-terminal fragment is lost upon affinity purification over Ni-NTA resin. Protein was expressed in BL21 star (DE3) cells in LB medium. The major peaks in each spectrum were in agreement with the calculated mass of the full-length enzyme, chPylRS (a), or the C-terminal fragment resulting from reinitiation at codon 107 (M) (b-c).

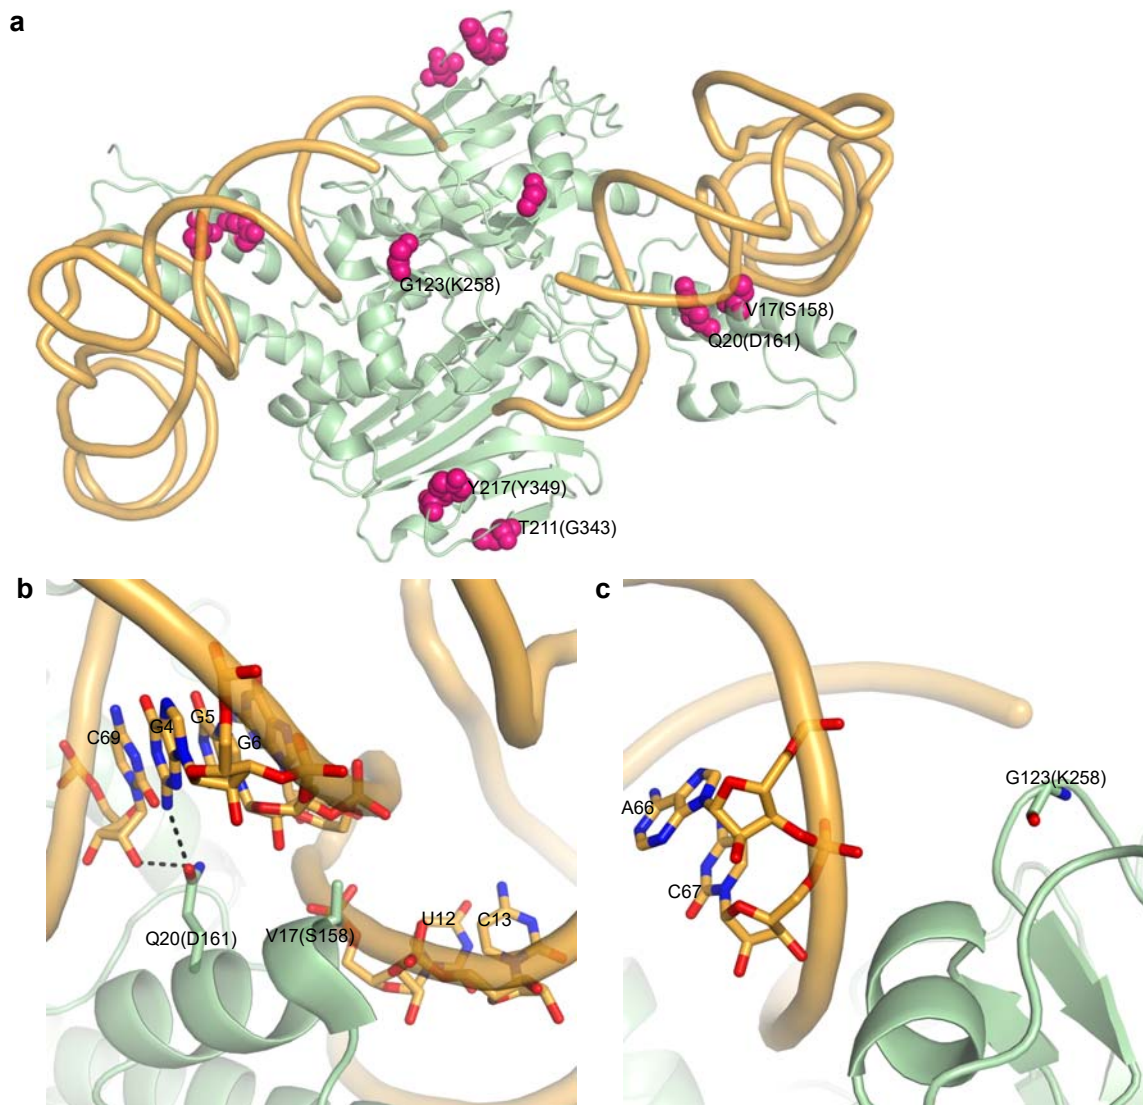

**Supplementary Figure 9** | Structural insight into PANCE mutations in the chPyIRS CTD. (a) Residues corresponding to PANCE mutations are mapped to the bacterial *D. hafniense* PyIRS•tRNA<sup>Pyl</sup> structure (PDB ID 2ZNI) as pink spheres. V17, Q20 (b), and G123 (c) in the *D. hafniense* CTD correspond to D161, S158 and K258 in chPyIRS; nucleotides in the vicinity of these residues are shown as sticks. Residue numbers corresponding to PANCE mutations are shown in parentheses. Polar interactions between *D. hafniense* PyIRS and tRNA<sup>Pyl</sup> are shown in black dashed lines.

V17 (S158) lies close to the phosphate group of G6, U12 and C13 in acceptor and D stem of tRNA. Thus, the S158N mutation may increase the affinity for tRNA<sup>Pyl</sup> by interacting with the corresponding nucleotides in archaeal tRNA<sup>Pyl</sup>. The O $\epsilon$ 1 of Q20 (D161) interacts with N2 of G4, while N $\epsilon$ 2 interacts with O2' of C69 in the acceptor stem. Thus, N $\delta$ 2 of N161 may form a similar interaction with O2' of A69 of archaeal tRNA<sup>Pyl</sup> thereby increasing the affinity to tRNA. G123 (K258) is close to the phosphate group of A66 or C67 in the acceptor stem. Thus, the mutant Q258 may interact with the phosphate group of corresponding residues in archaeal tRNA<sup>Pyl</sup>. T211 (G343) is far from tRNA<sup>Pyl</sup>; the effect of this mutation is unknown.

**Supplementary Table 1** | Apparent kinetic parameters of PylRS and chPylRS for Pyl acylation

| PylRS   | ncAA | $K_M$ ( $\mu\text{M}$ ) | $k_{\text{cat}}$ ( $10^{-3}\text{s}^{-1}$ ) | $\frac{k_{\text{cat}}}{K_M}$<br>( $10^{-3}\text{s}^{-1}\mu\text{M}^{-1}$ ) |
|---------|------|-------------------------|---------------------------------------------|----------------------------------------------------------------------------|
| MmPylRS | Pyl  | $21 \pm 4$              | $4.9 \pm 0.2$                               | 0.23                                                                       |
| MbPylRS | Pyl  | $16 \pm 2$              | $30 \pm 0.4$                                | 1.9                                                                        |
| chPylRS | Pyl  | $7.6 \pm 0.2$           | $11 \pm 1$                                  | 1.4                                                                        |

The three enzymes were overexpressed in BL21(DE3) cells induced by 1 mM IPTG for 4 hr at 37°C when cell density reached  $A_{600} = 0.6$ . They were purified using an N-terminal His<sub>6</sub>-tag by Ni-NTA. The purification of these enzymes is similar to the method described in **ONLINE METHODS** for c-Myc-chPylRS-6xHis variants, except the lysis buffer contains 1 M NaCl. The protein yield for the three enzymes is similar, around 10 mg/L of LB medium. Pure MmPylRS or MbPylRS precipitated from solution when the concentration exceeded ~2 mg/mL, while pure chPylRS could be concentrated to >15 mg/mL; this was a prerequisite for our crystallographic work on the full-length enzyme. The kinetic parameters were measured as described in **ONLINE METHODS**. The data were derived from three replicates. *M. mazei* tRNA<sup>Pyl</sup> was used for aminoacylation, and was produced by *in vitro* transcription. After purification as described in **ONLINE METHODS**, tRNA was refolded by heating to 100°C for 5 min in deionized water, and slowly cooled down to room temperature for 30 min.

**Supplementary Table 2 | Genotypes of mutant chPyIRS variants resulting from this work.**

| chPyIRS variant             | Mutations observed |     |      |      |               |        |       |       |       |       |  |       |
|-----------------------------|--------------------|-----|------|------|---------------|--------|-------|-------|-------|-------|--|-------|
|                             | D2N                | K3N | T56P | H62Y |               |        | E119K |       |       | K258Q |  | Y349F |
| <b>32A</b>                  | D2N                | K3N | T56P | H62Y |               |        | E119K |       |       | K258Q |  | Y349F |
| <b>32A-Nter<sup>†</sup></b> | D2N                | K3N | T56P | H62Y |               |        |       |       |       |       |  |       |
| <b>24B</b>                  |                    | K3N | T56P | H62Y | $\Delta$ t293 | R100N* |       | S158N |       |       |  | G343D |
| <b>25C</b>                  |                    | K3N | T56A | H62Y | $\Delta$ t293 |        |       |       | D161N |       |  | G343D |

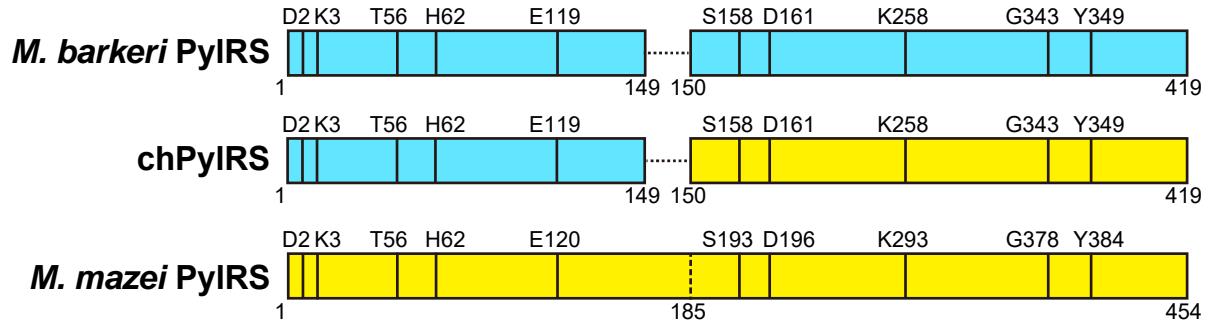

<sup>†</sup>32A-Nter was constructed by inserting the PANCE-evolved four N-terminal mutations into wild-type chPyIRS. As mutation  $\Delta$ t293 caused a -1 frameshift (resulting in chain termination, and use of the AUG107 codon as translation initiation site) and production of a split protein, other mutations are shown relative to the wild-type protein sequence within the corresponding coding frame. \*Mutation R100N is listed as relative to the frameshifted protein sequence (see **Supplementary Note** for detailed discussion of frameshifted region). The schematic sequence comparison of *M. barkeri* PyIRS, chPyIRS and *M. mazei* PyIRS relates the positions of the PANCE evolved mutations in the established numbering systems of the three different PyIRS enzymes.

**Supplementary Table 3 | Crystallographic data collection and refinement statistics**

| PylRS•tRNA <sup>Pyl</sup> complex                   | SeMet                      | MmPylRS NTD                | 32A NTD                    |
|-----------------------------------------------------|----------------------------|----------------------------|----------------------------|
| <b>PDB ID</b>                                       |                            | 5UD5                       | 5V6X                       |
| <b>Data collection</b>                              |                            |                            |                            |
| Space group                                         | <i>P</i> 3 <sub>1</sub> 21 | <i>P</i> 3 <sub>1</sub> 21 | <i>P</i> 3 <sub>1</sub> 21 |
| Cell dimensions                                     |                            |                            |                            |
| <i>a</i> , <i>b</i> , <i>c</i> (Å)                  | 72.1, 72.1, 239.0          | 72.3, 72.3, 239.0          | 72.6, 72.6, 238.6          |
| $\alpha$ , $\beta$ , $\gamma$ (°)                   | 90, 90, 120                | 90, 90, 120                | 90, 90, 120                |
| Wavelength (Å)                                      | 0.979190                   | 0.979200                   | 0.979200                   |
| Resolution (Å)                                      | 49.13–2.82 (2.99–2.82)*    | 49.22–2.35 (2.49–2.35)     | 49.33–2.76 (2.92–2.76)     |
| <i>R</i> <sub>meas</sub>                            | 0.100 (1.339)              | 0.059 (1.403)              | 0.074 (1.312)              |
| $\langle I/\sigma(I) \rangle$                       | 19.63 (1.96)               | 22.57 (1.88)               | 25.7 (1.88)                |
| <i>CC</i> <sub>1/2</sub>                            | 0.999 (0.927)              | 0.999 (0.779)              | 1.000 (0.880)              |
| Completeness (%)                                    | 99.8 (99.2)                | 99.7 (98.8)                | 99.9 (99.8)                |
| Redundancy                                          | 11.5 (11.3)                | 9.8 (10.1)                 | 9.7 (10.1)                 |
| <b>Refinement</b>                                   |                            |                            |                            |
| Resolution (Å)                                      |                            | 49.22–2.35                 | 49.33–2.76                 |
| No. reflections                                     |                            | 31207                      | 19633                      |
| <i>R</i> <sub>work</sub> / <i>R</i> <sub>free</sub> |                            | 0.216/0.242                | 0.206/0.249                |
| No. atoms                                           |                            |                            |                            |
| Protein                                             |                            | 1392                       | 1368                       |
| Ligand/ion                                          |                            | 2                          | 2                          |
| Water                                               |                            | 24                         | -                          |
| RNA                                                 |                            | 3020                       | 3020                       |
| <i>B</i> -factors                                   |                            |                            |                            |
| Protein                                             |                            | 71.5                       | 79.6                       |
| Ligand/ion                                          |                            | 70.5                       | 74.5                       |
| Water                                               |                            | 58.6                       | -                          |
| RNA                                                 |                            | 88.4                       | 95.7                       |
| R.m.s. deviations                                   |                            |                            |                            |
| Bond lengths (Å)                                    |                            | 0.004                      | 0.003                      |
| Bond angles (°)                                     |                            | 0.835                      | 0.636                      |

\*Values in parentheses are for highest-resolution shell.



**Supplementary Table 4 | Plasmids used in this work**

| Plasmid Name | Class (resistance)       | Origin  | ORF1              |                                                        | ORF2              |             | Reference        |
|--------------|--------------------------|---------|-------------------|--------------------------------------------------------|-------------------|-------------|------------------|
|              |                          |         | Prom              | [RBS] <sup>4</sup> Genes                               | Prom              | Genes       |                  |
| pJC175e      | AP (carb <sup>R</sup> )  | SC101   | P <sub>psp</sub>  | [SD8] <i>gIII</i> , <i>luxAB</i>                       | –                 | –           | ( <sup>5</sup> ) |
| pDB038       | AP (spec <sup>R</sup> )  | ColE1   | P <sub>psp</sub>  | [SD8] <i>gIII</i> (P29am), <i>luxAB</i>                | P <sub>ProK</sub> | <i>pyIT</i> | This work        |
| pDB038a      | AP (spec <sup>R</sup> )  | ColE1   | P <sub>psp</sub>  | [SD8] <i>gIII</i> (P29am, Y184am), <i>luxAB</i>        | P <sub>ProK</sub> | <i>pyIT</i> | This work        |
| pDB038b      | AP (spec <sup>R</sup> )  | ColE1   | P <sub>psp</sub>  | [SD8] <i>gIII</i> (P29am, P83am, Y184am), <i>luxAB</i> | P <sub>ProK</sub> | <i>pyIT</i> | This work        |
| MP6          | MP (chlor <sup>R</sup> ) | cloDF13 | P <sub>psp</sub>  | <i>dnaQ926</i> , <i>dam</i> , <i>seqA</i>              | P <sub>C</sub>    | <i>araC</i> | ( <sup>6</sup> ) |
| SP-chPylRS   | SP (none)                | M13 f1  | P <sub>gIII</sub> | [SD4] <i>chPyl</i>                                     | –                 | –           | This work        |

Plasmids pDB038, pDB038a, and pDB038b contain *gIII* with mutations P29am, P29am/E84am, and P29am/E84am/Y183am, respectively. Selection phage SP-chPylRS embodies a mutant M13 phage with *chPylRS* inserted in place of *gIII*, as described in this work.

## SUPPLEMENTARY NOTE

### DNA and amino acid sequences of ChPylRS variants (with mutations in red)

#### chPylRS (ancestor)

ATGGATAAGAAGCCGCTGGATGTTCTGATCTCTGCGACCGGTCTGTGGATGTCCCGTACCGGCACG  
CTGCACAAGATCAAGCACTATGAGGTTTCTCGTTCTAAAATCTACATCGAAATGGCGTGTGGTGAC  
CATCTGGTTGTGAACAACCTCTCGTTCTTGTCTGACCGCACGTGCATTCCGTCATCATAAATACCGT  
AAAACCTGCAAACGTTGTCGTGTTTCTGACGAAGATATCAACAACCTTCTGACCCGTTCTACCGAA  
GGCAAACCTCTGTTAAAGTTAAAGTTGTTTCTGCGCCGAAAGTGAAAAAGCGATGCCGAAATCT  
GTTTCTCGTGCGCCGAAACCGCTGGAAAATCCGTTTCTGCGAAAGCGTCTACCGACACCTCTCGT  
TCTGTTCCGTCTCCGGCGAAATCTACCCCGAACTCTCCGGTTCGACCTCTGCAAGTGCCCCCGCA  
CTTACGAAGAGCCAGACTGACAGGCTTGAAGTCCTGTTAAACCCAAAAGATGAGATTTCCCTGAAT  
TCCGGCAAGCCTTTCAGGGAGCTTGAGTCCGAATTGCTCTCTCGCAGAAAAAAGACCTGCAGCAG  
ATCTACGCGGAAGAAAGGGAGAATTATCTGGGGAACTCGAGCGTGAAATTACCAGGTTCTTTGTG  
GACAGGGGTTTTCTGGAAATAAAATCCCGATCCTGATCCCTCTTGAGTATATCGAAAGGATGGGC  
ATTGATAATGATACCGAACTTTCAAACAGATCTTCAGGGTTGACAAGAAGTTCTGCCTGAGACCC  
ATGCTTGCTCCAAACCTTTACAACCTGCGCAAGCTTGACAGGGCCCTGCCTGATCCAATAAAA  
ATTTTTGAAATAGGCCCATGCTACAGAAAAGAGTCCGACGGCAAAGAACACCTCGAAGAGTTTACC  
ATGCTGAACTTCTGCCAGATGGGATCGGGATGCACACGGGAAAATCTTGAAAGCATAATTACGGAC  
TTCCTGAACCACCTGGGAATTGATTTCAAGATCGTAGGCGATTCTGCATGGTCTATGGGGATACC  
CTTGATGTAATGCACGGAGACCTGGAACCTTCTCTGCAGTAGTCGGACCCATACCGCTTGACCGG  
GAATGGGGTATTGATAAACCTGGATAGGGGCAGGTTTCGGACTCGAACGCCTTCTAAAGGTTAAA  
CACGACTTTAAAAATATCAAGAGAGCTGCAAGGTCCGAGTCTTACTATAACGGGATTTCTACCAAC  
CTGTAA

#### chPylRS (ancestor)

MDKKPLDVLISATGLWMSRTGLHKKIKHYEVSRSKIYIEMACGDHLVVNNSRSCRTARAFRHHKYR  
KTCKRCRVSDDEDINNFLTRSTEGKTSVKVKVVSAPKVKKAMPKSVSRAPKPLENPVSAKASTDTSR  
SVPSPAKSTPNSPVPTSASAPALTKSQDRLEVLLNPKDEISLNSGKPFRELESELLSRRKKDLQQ  
IYAEERENYLGKLEREITRFFVDRGFLEIKSPILIPLEYIERMGIDNDELKQIFRVDKNFCLRP  
MLAPNLYNLRKLDRALPDPIKIFEIGPCYRKESDGKEHLEEFMLNFCQMSGGCTRENLESIITD  
FLNHLGIDFKIVGDSCMVYGDLDVMHGDLELSSAVVGGPIPLDREWGIDKPWIGAGFGLERLLKVK  
HDFKNIKRAARSESYYNGISTNL

#### Evolved variant 32A

ATGAATAATAAGCCGCTGGATGTTCTGATCTCTGCGACCGGTCTGTGGATGTCCCGTACCGGCACG  
CTGCACAAGATCAAGCACTATGAGGTTTCTCGTTCTAAAATCTACATCGAAATGGCGTGTGGTGAC  
CATCTGGTTGTGAACAACCTCTCGCTCTTGCCTCCGCACGTGCATTCCGTTATCATAAATACCGT  
AAAACCTGCAAACGTTGTCGTGTTTCTGACGAAGATATCAACAACCTTCTGACCCGTTCTACCGAA

GGCAAACCTCTGTAAAGTTAAAGTTGTTTCTGCGCCGAAAGTGAAAAAGCGATGCCGAAATCT  
GTTTCTCGTGCGCCGAAACCGCTGAAAAATCCGGTTTCTGCGAAAGCGTCTACCGACACCTCTCGT  
TCTGTTCCGTCTCCGGCGAAATCTACCCCGAACTCTCCGGTTCGACCTCTGCAAGTGCCCCGCA  
CTTACGAAGAGCCAGACTGACAGGCTTGAAGTCCTGTAAACCCAAAAGATGAGATTTCCCTGAAT  
TCCGGCAAGCCTTTCAGGGAGCTTGAGTCCGAATTGCTCTCTCGCAGAAAAAAGACCTGCAGCAG  
ATCTACGCGGAAGAAAGGGAGAATTATCTGGGGAAACTCGAGCGTGAAATTACCAGGTTCTTTGTG  
GACAGGGGTTTTCTGGAAATAAAATCCCGATCCTGATCCCTCTTGAGTATATCGAAAGGATGGGC  
ATTGATAATGATACCGAACTTTCAAACAGATCTTCAGGGTTGACCAGAACTTCTGCCTGAGACCC  
ATGCTTGCTCCAAACCTTTACAACCTACCTGCGCAAGCTTGACAGGGCCCTGCCTGATCCAATAAAA  
ATTTTTGAAATAGGCCCATGCTACAGAAAAGAGTCCGACGGCAAAGAACACCTCGAAGAGTTTACC  
ATGCTGAACTTCTGCCAGATGGGATCGGGATGCACACGGGAAAATCTTGAAAGCATAATTACGGAC  
TTCCTGAACCACCTGGGAATTGATTTCAAGATCGTAGGCGATTCTGCATGGTCTTTGGGGATACC  
CTTGATGTAATGCACGGAGACCTGGAACCTTCTCTGCAGTAGTCGGACCCATACCGCTTGACCGG  
GAATGGGGTATTGATAAACCTGGATAGGGGCAGGTTTCGGACTCGAACGCCTTCTAAAGGTTAAA  
CACGACTTTAAAAATATCAAGAGAGCTGCAAGGTCCGAGTCTTACTATAACGGGATTTCTACCAAC  
CTGTAA

### Evolved variant 32A

MNNKPLDVLISATGLWMSRTGTLHKIKHYEVSRSKIYIEMACGDHLVVNNSRSCRPARAFRYHKYR  
KTCKRCRVSDDEDINNFLTRSTEGKTSVKVKVVSAPKVKKAMPKSVSRAPKPLKNPVSAKASTDTSR  
SVPSPAKSTPNSPVPTSASAPALTKSQDRLEVLLNPKDEISLNSGKPFRELESELLSRRKKDLQQ  
IYAEERENYLGKLEREITRFFVDRGFLEIKSPILIPLEYIERMGIDNDELKQIFRVDQNFCLRP  
MLAPNLYNYLRKLDRALPDPIKIFEIGPCYRKESDGKEHLEEFMLNFCQMGSGCTRENLESIITD  
FLNHLGIDFKIVGDSCMVFGDTLDVMHGDLELSSAVVGIPLDREWGIDKPWIGAGFGLERLLKVK  
HDFKNIKRAARSESYYNGISTNL

### Evolved variant 24B

ATGGATAATAAGCCGCTGGATGTTCTGATCTCTGCGACCGGTCTGTGGATGTCCCGTACCGGCACG  
CTGCACAAGATCAAGCACTATGAGGTTTCTCGTTCTAAAATCTACATCGAAATGGCGTGTGGTGAC  
CATCTGGTTGTGAACAACCTCTCGTTCTTGTCTGTCACCGCACGTGCATTCCGTATCATAAATACCGT  
AAAACCTGCAAACGTTGTCGTGTTTCTGACGAAGATATCAACAACCTTCTGACCGGTTCTACCGAA  
GGCAAACCTCTGTAAAGTTAAAGTTGTT-CTGAAACCGAAAGTGAAAAAGCGATGCCGAAATCT  
GTTTCTCGTGCGCCGAAACCGCTGGAAAATCCGGTTTCTGCGAAAGCGTCTACCGACACCTCTCGT  
TCTGTTCCGTCTCCGGCGAAATCTACCCCGAACTCTCCGGTTCGACCTCTGCAAGTGCCCCGCA  
CTTACGAAGAACCAGACTGACAGGCTTGAAGTCCTGTAAACCCAAAAGATGAGATTTCCCTGAAT  
TCCGGCAAGCCTTTCAGGGAGCTTGAGTCCGAATTGCTCTCTCGCAGAAAAAAGACCTGCAGCAG  
ATCTACGCGGAAGAAAGGGAGAATTATCTGGGGAAACTCGAGCGTGAAATTACCAGGTTCTTTGTG  
GACAGGGGTTTTCTGGAAATAAAATCCCGATCCTGATCCCTCTTGAGTATATCGAAAGGATGGGC  
ATTGATAATGATACCGAACTTTCAAACAGATCTTCAGGGTTGACAAGAACTTCTGCCTGAGACCC  
ATGCTTGCTCCAAACCTTTACAACCTACCTGCGCAAGCTTGACAGGGCCCTGCCTGATCCAATAAAA

ATTTTTGAAATAGGCCCATGCTACAGAAAAGAGTCCGACGGCAAAGAACACCTCGAAGAGTTTACC  
ATGCTGAACTTCTGCCAGATGGGATCGGGATGCACACGGGAAAATCTTGAAAGCATAATTACGGAC  
TTCCTGAACCACCTGGGAATTGATTTCAAGATCGTAGACGATTCCTGCATGGTCTATGGGGATACC  
CTTGATGTAATGCACGGAGACCTGGAACCTTCTCTGCAGTAGTCGGACCCATACCGCTTGACCGG  
GAATGGGGTATTGATAAACCTGGATAGGGGCAGGTTTCGGACTCGAACGCCTTCTAAAGGTTAAA  
CACGACTTTAAAAATATCAAGAGAGCTGCAAGGTCCGAGTCTTACTATAACGGGATTTCTACCAAC  
CTGTAA

**Evolved variant 24B: N-terminal fragment**

MDNKPLDVLISATGLWMSRTGLHKIKHYEVSRSKIYIEMACGDHLVVNNSRSCRPARAFRYHKYR  
KTCKRCRVSDDEDINNFLTRSTEGKTSVKVKVV**LNRK-**

**Evolved variant 24B: C-terminal fragment**

MPKSVSRAPKPLENPVSAKASTDTSRSVPSPAKSTPNSPVPTSASAPALTK**N**QTDRLVLLNPKDE  
ISLNSGKPFRELESELLSRRKKDLQQIYAEERENYLGKLEREITRFFVDRGFLEIKSPIILIPLEYI  
ERMIDNDTELSKQIFRVDKNFCLRPMLAPNLNYLRKLDRALPDPIKIFEIGPCYRKESDGKEHL  
EFTMLNFCQMSGCTRENLESIITDFLNHLGIDFKIV**D**DSCMVYGDTLDVMHGDLELSSAVVGPI  
PLDREWGIDKPWIGAGFGLERLLKVKHDFKNIKRAARSESYNGISTNL-

**Evolved variant 25C:**

ATGGATAA**T**AAGCCGCTGGATGTTCTGATCTCTGCGACCGGTCTGTGGATGTCCCGTACCGGCACG  
CTGCACAAGATCAAGCACTATGAGGTTTCTCGTTCTAAAATCTACATCGAAATGGCGTGTGGTGAC  
CATCTGGTTGTGAACAACCTCTCGTTCTTGT**G**CGT**G**CCGCACGTGCATTCCGT**T**ATCATAAATACCGT  
AAAACCTGCAAACGTTGTCGTGTTTCTGACGAAGATATCAACAACCTTCTGACCCGTTCTACCGAA  
GGCAAACCTCTGTTAAAGTTAAAGTTGTT-CTGCGCCGAAAGTGAAAAAGCGATGCCGAAATCT  
GTTTCTCGTGCGCCGAAACCGCTGGAAAATCCGTTTCTGCGAAAGCGTCTACCGACACCTCTCGT  
TCTGTTCCGTCTCCGGCGAAATCTACCCCGAACTCTCCGTTCCGACCTCTGCAAGTGCCCCGCA  
CTTACGAAGAGCCAGACT**A**ACAGGCTTGAAGTCCTGTTAAACCCAAAAGATGAGATTTCCCTGAAT  
TCCGGCAAGCCTTTCAGGGAGCTTGAGTCCGAATTGCTCTCTCGCAGAAAAAAGACCTGCAGCAG  
ATCTACGCGGAAGAAAGGGAGAATTATCTGGGGAAACTCGAGCGTGAAATTACCAGGTTCTTTGTG  
GACAGGGGTTTTCTGGAAATAAAATCCCGATCCTGATCCCTCTTGAGTATATCGAAAGGATGGGC  
ATTGATAATGATACCGAACTTTCAAACAGATCTTCAGGGTTGACAAGAACTTCTGCCTGAGACCC  
ATGCTTGCTCCAAACCTTTACAACCTGCGCAAGCTTGACAGGGCCCTGCCTGATCCAATAAAA  
ATTTTTGAAATAGGCCCATGCTACAGAAAAGAGTCCGACGGCAAAGAACACCTCGAAGAGTTTACC  
ATGCTGAACTTCTGCCAGATGGGATCGGGATGCACACGGGAAAATCTTGAAAGCATAATTACGGAC  
TTCCTGAACCACCTGGGAATTGATTTCAAGATCGTAG**A**CGATTCCTGCATGGTCTATGGGGATACC  
CTTGATGTAATGCACGGAGACCTGGAACCTTCTCTGCAGTAGTCGGACCCATACCGCTTGACCGG  
GAATGGGGTATTGATAAACCTGGATAGGGGCAGGTTTCGGACTCGAACGCCTTCTAAAGGTTAAA  
CACGACTTTAAAAATATCAAGAGAGCTGCAAGGTCCGAGTCTTACTATAACGGGATTTCTACCAAC  
CTGTAA

### Evolved variant 25C: N-terminal fragment

MDNKPLDVLISATGLWMSRTGTLHKIKHYEVSRSKIYIEMACGDHLVVNNSRSCR**A**ARAFR**Y**HKYR  
KTCKRCRVSDDEDINNFLTRSTEGKTSVKVKVV**LRRK-**

### Evolved variant 25C: C-terminal fragment

MPKSVSRAPKPLENPVSAKASTDTSRSVPSPAKSTPNSPVPTSASAPALTKSQT**N**RLEVLLNPKDE  
ISLNSGKPFRELESELLSRRKKDLQQIYAEERENYLGKLEREITRFFVDRGFLEIKSPIILIPLEYI  
ERMGIDNDELTSKQIFRVDKNFCLRPMLAPNLNYLRKLDRALPDPIKIFEIGPCYRKESDGEHL  
EFTMLNFCQMGSGCTRENLESIITDFLNHLGIDFKIV**D**DSCMVYGDTLDVMHGDLLELSSAVVGPI  
PLDREWGIDKPWIGAGFGLERLLKVKHDFKNIKRAARSESYYNGISTNL

**Effects of frameshift mutations on scrambled regions of chPyIRS.** In sample 24B, mutation  $\Delta t293$  results in a frameshift beginning at residue V98. This causes in a synonymous change at residue 98, and nonsynonymous changes at residues 99-103 (SAPKV becomes LNRK-Opal). Within this frameshifted region, there are two additional mutations: c299a, and g300a. This leads to mutation R100N within the frameshifted region; in the absence of the frameshift however, these two nucleotide mutations fall in the same codon causing mutation A100E (note that the non-frameshifted wild-type sequence has an 'A' residue at position 100). As A100E has been shown<sup>7</sup> to bestow a benefit, it is likely that mutation A100E occurred within this lineage prior to the appearance of the frameshift. Similarly, within sample 25C, mutation  $\Delta t293$  results in a frameshift beginning at residue V98. This causes a synonymous change at residue 98, and nonsynonymous changes at residues 99-103 (SAPKV becomes LRRK-Opal).

1. Larkin, M.A. et al. Clustal W and Clustal X version 2.0. *Bioinformatics* **23**, 2947-2948 (2007).
2. Umehara, T. et al. N-acetyl lysyl-tRNA synthetases evolved by a CcdB-based selection possess N-acetyl lysine specificity in vitro and in vivo. *FEBS Lett* **586**, 729-733 (2012).
3. Ko, J.H. et al. Pyrrolysyl-tRNA synthetase variants reveal ancestral aminoacylation function. *FEBS Lett* **587**, 3243-3248 (2013).
4. Ringquist, S. et al. Translation initiation in *Escherichia coli*: sequences within the ribosome-binding site. *Mol Microbiol* **6**, 1219-1229 (1992).
5. Badran, A.H. et al. Continuous evolution of *Bacillus thuringiensis* toxins overcomes insect resistance. *Nature* **533**, 58-63 (2016).
6. Badran, A.H. & Liu, D.R. Development of potent *in vivo* mutagenesis plasmids with broad mutational spectra. *Nat Commun* **6**, 8425 (2015).
7. Bryson, D. et al. Continuous directed evolution of aminoacyl-tRNA synthetases. *Nat Chem Biol*, aa-bb (2017).
